# Supplementary material for: New tricks for old dogs: improving the accuracy of biomolecular force fields by pair-specific corrections to non-bonded interactions
Source: Royal Society of Chemistry journal article supplement (doi:10.1039/c7cp08185e), 2018-01-01
Supplement: c7cp08185e1.pdf [file c7cp08185e1.pdf]

# **Supplementary Information: New tricks for old dogs: Improving the accuracy of biomolecular force fields by pair-specific corrections to non-bonded interactions**

Jejoong Yoo<sup>†,‡</sup> and Aleksei Aksimentiev<sup>\*,†</sup>

*†Center for the Physics of Living Cells, Department of Physics, University of Illinois at Urbana-Champaign, 1110 West Green Street, Urbana, Illinois 61801*

*‡Center for Self-assembly and Complexity, Institute for Basic Science, Pohang, 37363, Republic of Korea*

E-mail: aksiment@illinois.edu

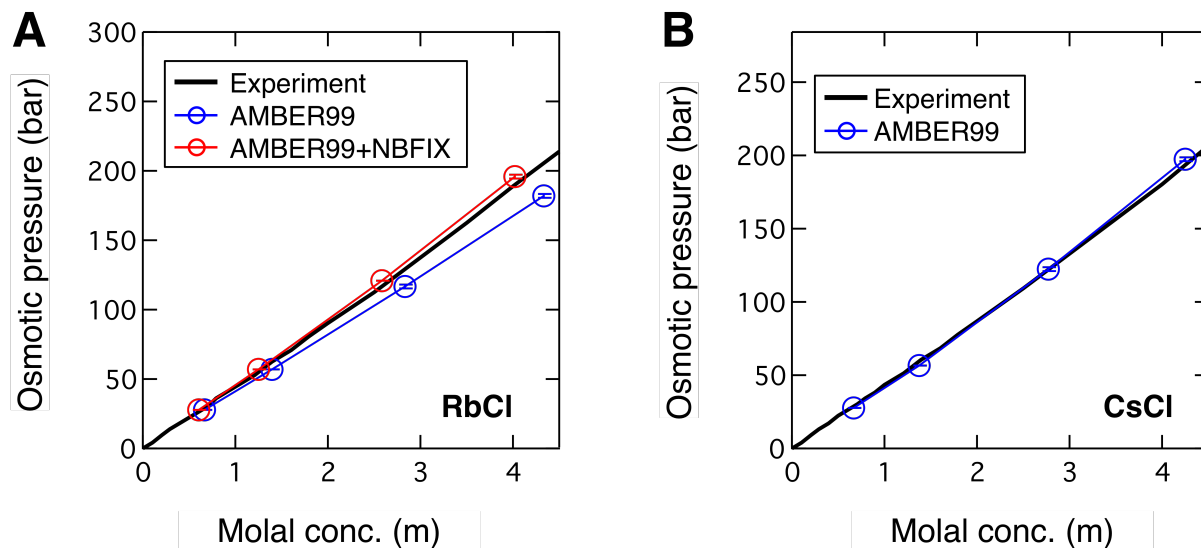

**Figure S1:** Validation and calibration of  $\text{Rb}^+-\text{Cl}^-$  (A) and  $\text{Cs}^+-\text{Cl}^-$  (B) ion pair interactions for the AMBER ff99 force fields using osmotic pressure simulations. Standard ion parameters optimized for the TIP3P water were taken from Joung and Cheatham.<sup>1</sup> The simulation method for computing osmotic pressure was similar to that used in Ref. 2 and 3. NBFIX corrections, if necessary, were applied to the Lennard-Jones  $\sigma$  parameters for cation–anion atom pairs. Experimental data were taken from Ref. 4. See Table 3 for the changes in  $\sigma$  parameters.

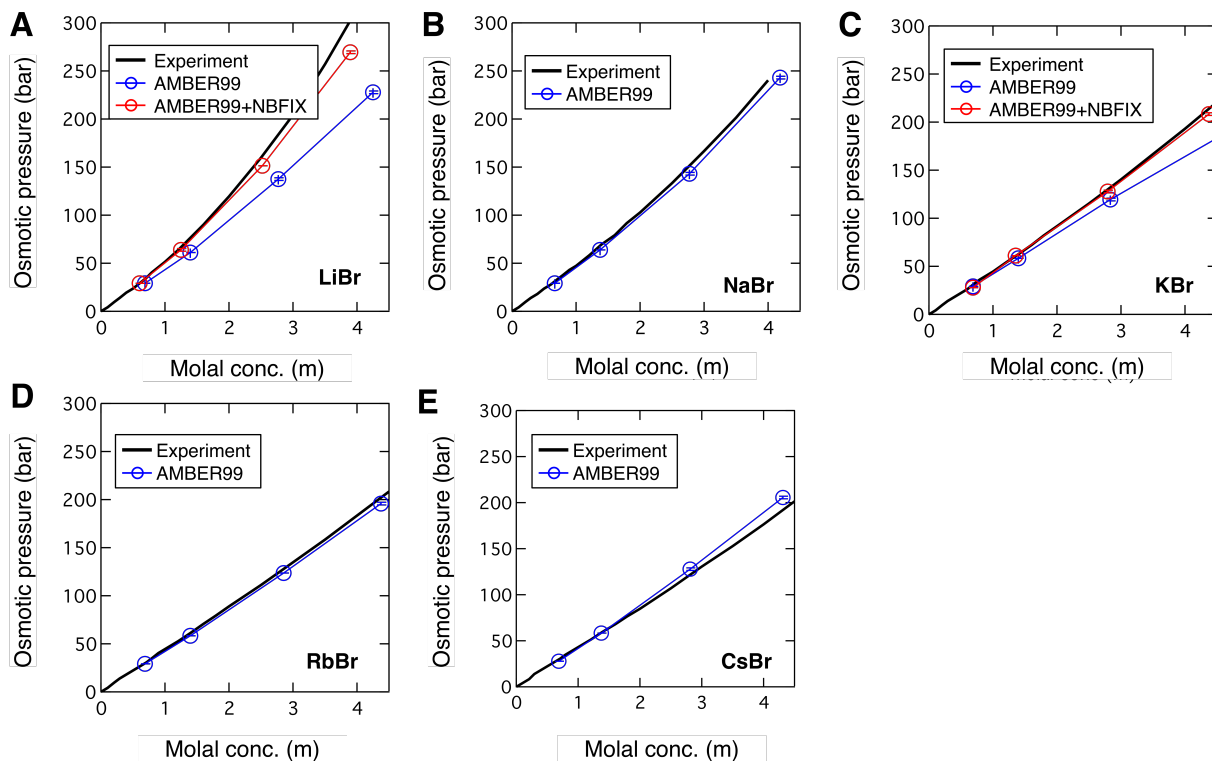

**Figure S2:** Validation and calibration of  $\text{Li}^+-\text{Br}^-$  (A),  $\text{Na}^+-\text{Br}^-$  (B),  $\text{K}^+-\text{Br}^-$  (C),  $\text{Rb}^+-\text{Br}^-$  (D), and  $\text{Cs}^+-\text{Br}^-$  (E) ion pair interactions for the AMBER ff99 force fields using osmotic pressure simulations. Standard ion parameters optimized for the TIP3P water were taken from Joung and Cheatham.<sup>1</sup> The simulation method for computing osmotic pressure was similar to that used in Ref. 2 and 3. NBFIX corrections, if necessary, were applied to the Lennard-Jones  $\sigma$  parameters for cation-anion atom pairs. Experimental data were taken from Ref. 4. See Table 3 for the changes in  $\sigma$  parameters.

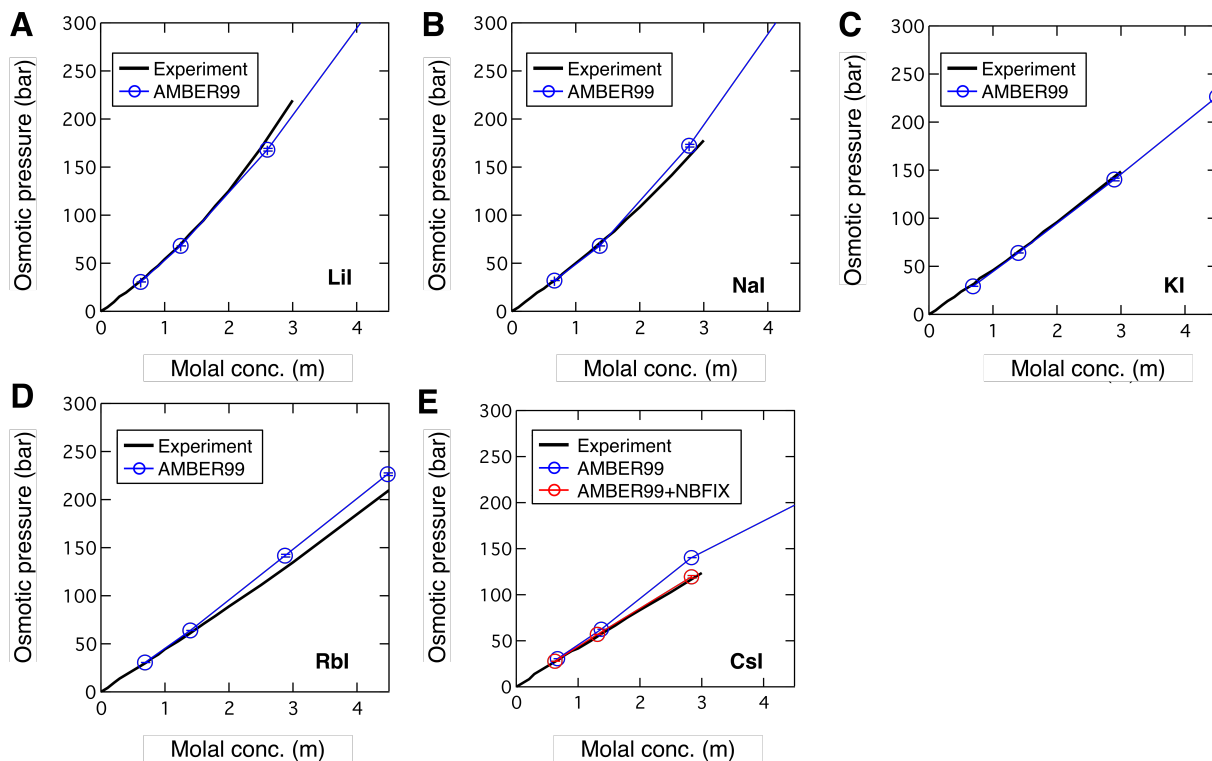

**Figure S3:** Validation and calibration of  $\text{Li}^+-\text{I}^-$  (A),  $\text{Na}^+-\text{I}^-$  (B),  $\text{K}^+-\text{I}^-$  (C),  $\text{Rb}^+-\text{I}^-$  (D), and  $\text{Cs}^+-\text{I}^-$  (E) ion pair interactions for the AMBER ff99 force fields using osmotic pressure simulations. Standard ion parameters optimized for the TIP3P water were taken from Joung and Cheatham.<sup>1</sup> The simulation method for computing osmotic pressure was similar to that used in Ref. 2 and 3. NBFIX corrections, if necessary, were applied to the Lennard-Jones  $\sigma$  parameters for cation-anion atom pairs. Experimental data were taken from Ref. 4. See Table 3 for the changes in  $\sigma$  parameters.

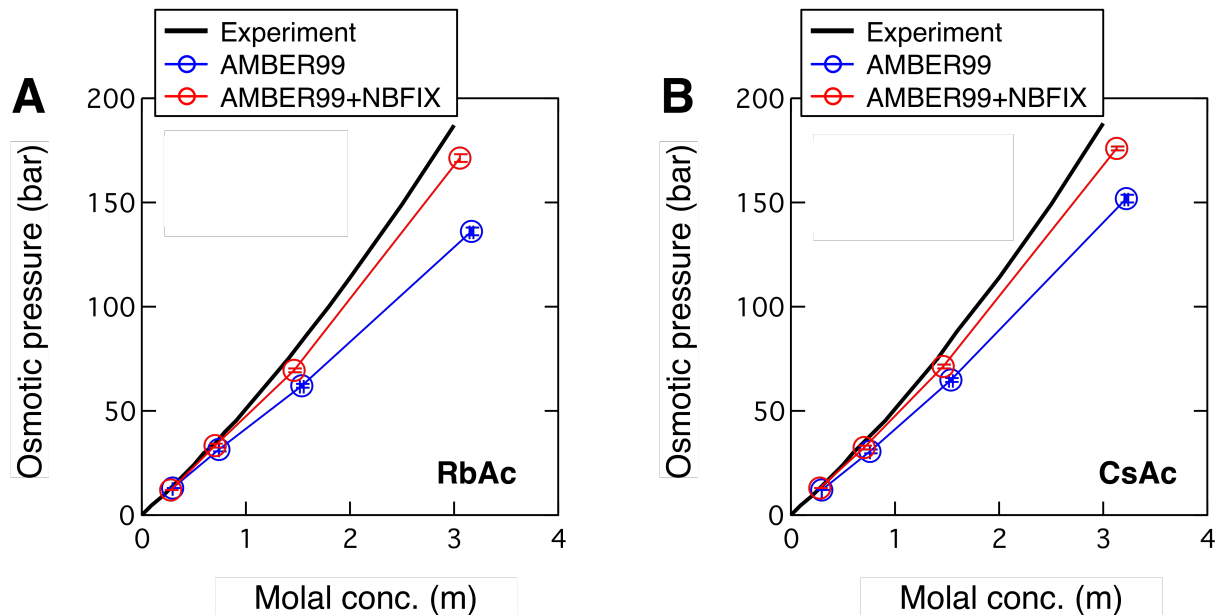

**Figure S4:** Validation and calibration of  $\text{Rb}^+-\text{Ac}^-$  (A) and  $\text{Cs}^+-\text{Ac}^-$  (B) ion pair interactions for the AMBER ff99 force fields using osmotic pressure simulations. Standard ion parameters optimized for the TIP3P water were taken from Joung and Cheatham.<sup>1</sup> Standard parameters for acetate were taken from AMBER ff99. The simulation method for computing osmotic pressure was similar to that used in Ref. 2 and 3. NBFIX corrections, if necessary, were applied to the Lennard-Jones  $\sigma$  parameters for cation-acetate oxygen atom pairs. Experimental data were taken from Ref. 4. See Table 3 for the changes in  $\sigma$  parameters.

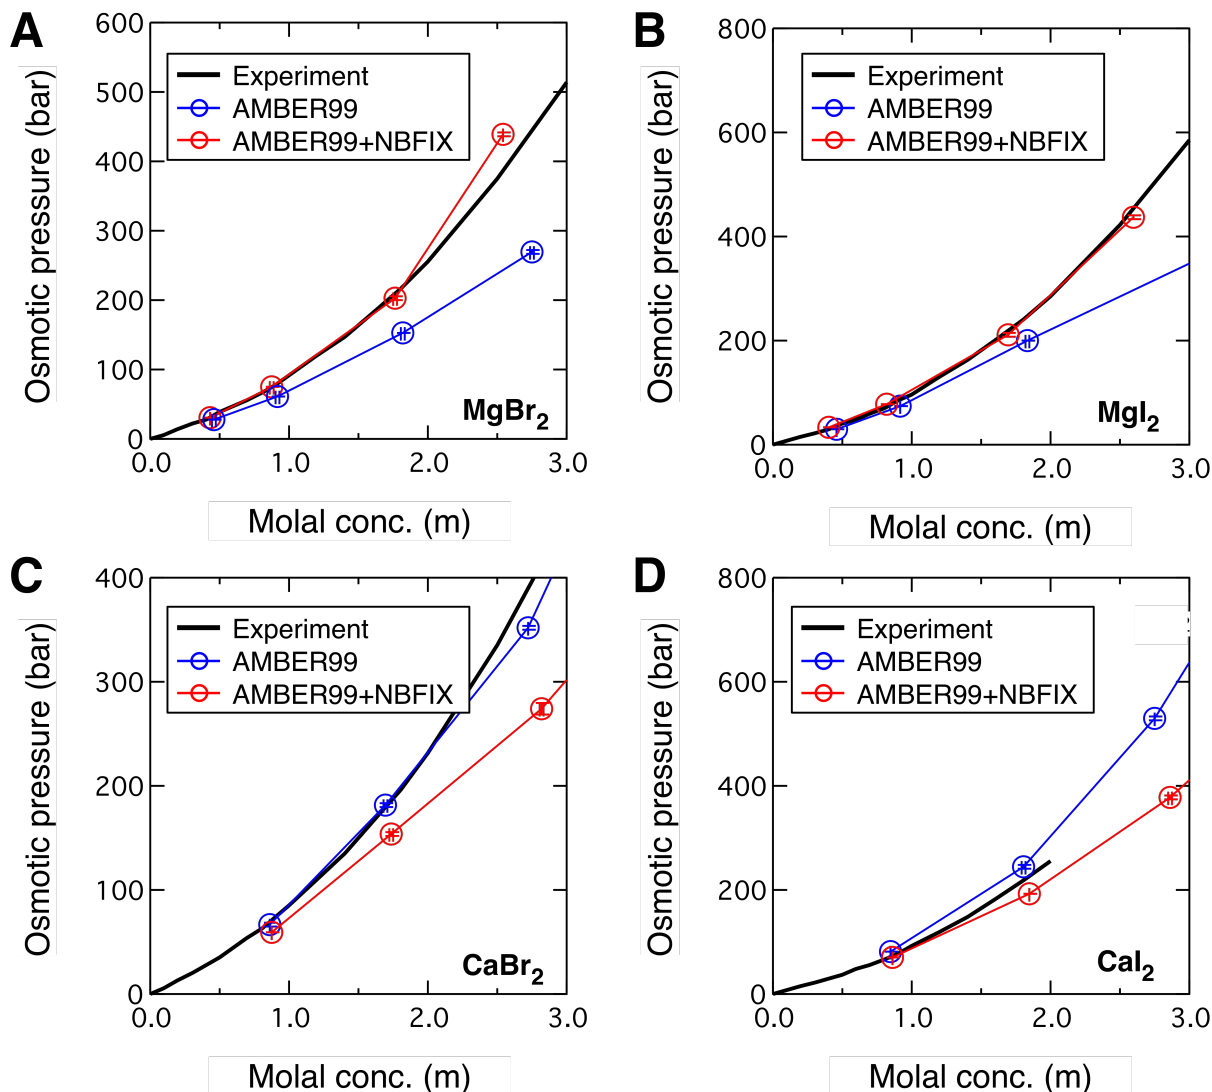

**Figure S5:** Validation and calibration of  $\text{Mg}^{2+}\text{-Br}^-$  (A),  $\text{Mg}^{2+}\text{-I}^-$  (B),  $\text{Ca}^{2+}\text{-Br}^-$  (C), and  $\text{Ca}^{2+}\text{-I}^-$  (D) ion pair interactions for the AMBER ff99 force fields using osmotic pressure simulations. Standard parameters for  $\text{Mg}^{2+}$  and  $\text{Ca}^{2+}$  were taken from the CHARMM36 force field.<sup>5</sup> In all calibration simulations that used NBFIX,  $\text{Mg}^{2+}$  and  $\text{Ca}^{2+}$  ions were in the hexahydrate and heptahydrate forms, respectively; the dipole moment of the water molecules forming hexa- and heptahydrates was adjusted to account for the polarization effect.<sup>2</sup> Standard parameters for  $\text{Br}^-$  and  $\text{I}^-$  were taken from Joung and Cheatham.<sup>1</sup> The simulation method for computing osmotic pressure was similar to that used in Ref. 2 and 3. NBFIX corrections, if necessary, were applied to the Lennard-Jones  $R_{\min}$  parameter of the hexa- or heptahydrate water oxygen – anion atom pairs. Experimental data were taken from Ref. 4. See Table 3 for the changes in  $\sigma$  parameters.

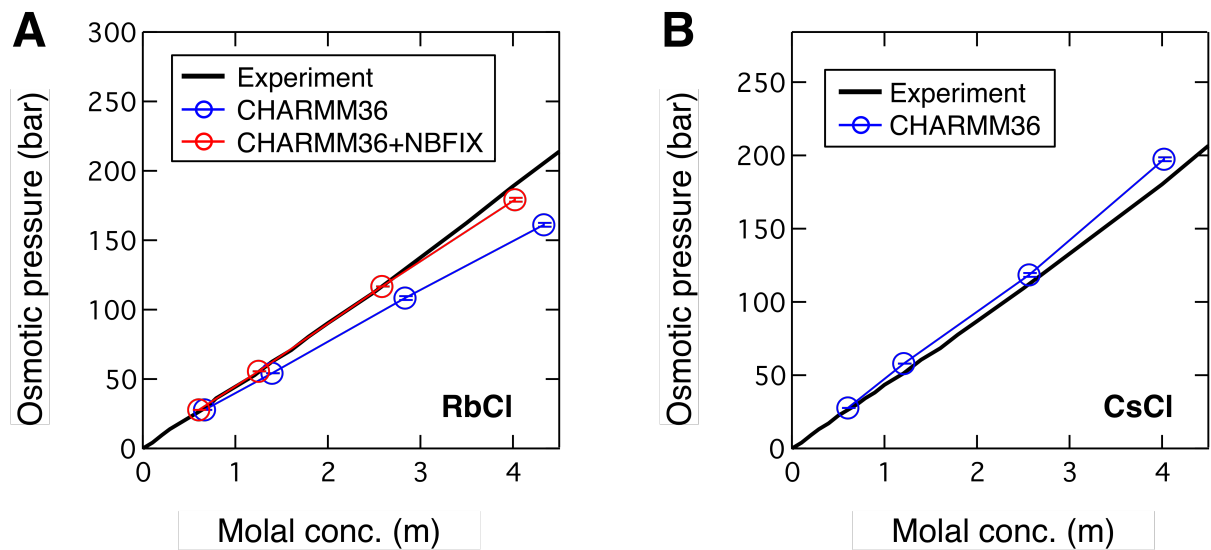

**Figure S6:** Validation and calibration of  $\text{Rb}^+-\text{Cl}^-$  (A) and  $\text{Cs}^+-\text{Cl}^-$  (B) ion pair interactions for the CHARMM36 force field using osmotic pressure simulations. The simulation method for computing osmotic pressure was similar to that used in Ref. 2 and 3. NBFIX corrections, if necessary, were applied to the Lennard-Jones  $R_{\min}$  parameters for cation-anion atom pairs. Experimental data were taken from Ref. 4. See Table 4 for the changes in  $R_{\min}$  parameters.

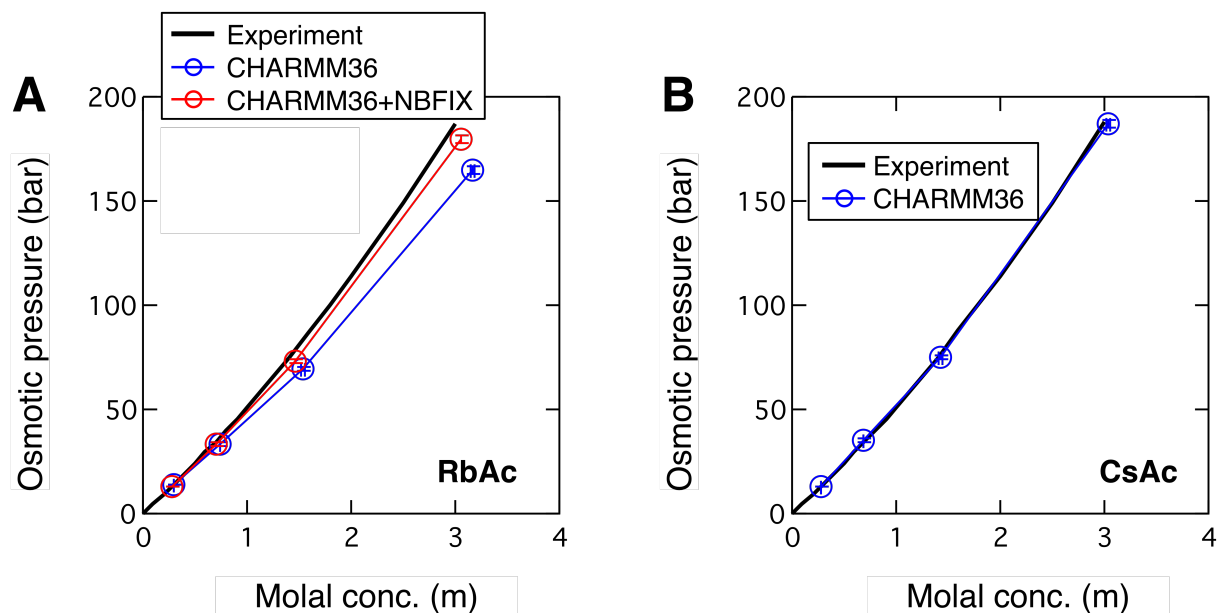

**Figure S7:** Validation and calibration of  $\text{Rb}^+-\text{Ac}^-$  (A) and  $\text{Cs}^+-\text{Ac}^-$  (B) ion pair interactions for the CHARMM36 force field using osmotic pressure simulations. The simulation method for computing osmotic pressure was similar to that used in Ref. 2 and 3. NBFIX corrections, if necessary, were applied to the Lennard-Jones  $R_{\min}$  parameters for cation–acetate oxygen atom pairs. Experimental data were taken from Ref. 4. See Table 4 for the changes in  $R_{\min}$  parameters.



## References

- (1) Joung, I. S.; Cheatham, T. E. Determination of Alkali and Halide Monovalent Ion Parameters for Use in Explicitly Solvated Biomolecular Simulations. *J. Phys. Chem. B* **2008**, *112*, 9020–9041.
- (2) Yoo, J.; Aksimentiev, A. Improved Parametrization of  $\text{Li}^+$ ,  $\text{Na}^+$ ,  $\text{K}^+$ , and  $\text{Mg}^{2+}$  Ions for All-Atom Molecular Dynamics Simulations of Nucleic Acid Systems. *J. Phys. Chem. Lett.* **2012**, *3*, 45–50.
- (3) Yoo, J.; Aksimentiev, A. Improved Parameterization of Amine–Carboxylate and Amine–Phosphate Interactions for Molecular Dynamics Simulations Using the CHARMM and AMBER Force Fields. *J. Chem. Theory Comput.* **2016**, *12*, 430–443.
- (4) Robinson, R. A.; Stokes, R. H. *Electrolyte Solutions*; Butterworths scientific publications, 1959.
- (5) Hart, K.; Foloppe, N.; Baker, C. M.; Denning, E. J.; Nilsson, L.; MacKerell, Jr., A. D. Optimization of the CHARMM Additive Force Field for DNA: Improved Treatment of the BI/BII Conformational Equilibrium. *J. Chem. Theory Comput.* **2012**, *8*, 348–362.
